# Supplementary material
Source: PubMed Central journal article supplement (PMC5516273)
Supplement: NIHMS838900-supplement-Wolff_et_al.pdf [file NIHMS838900-supplement-Wolff_et_al.pdf]

Disclaimer: The manuscript and its contents are confidential, intended for journal review purposes only, and not to be further disclosed.

URL: <http://circheartfailure-submit.aha-journals.org>

Title: Survival benefits of invasive vs. conservative strategies in heart failure patients with reduced ejection fraction and coronary artery disease

Manuscript number: CIRCHF/2016/003255R2

Author(s): Eliano Navarese, University of Dusseldorf

Georg Wolff, Heinrich-Heine-University

Dimitrios Dimitroulis, University Duesseldorf, Medical Faculty

Felicita Andreotti, Catholic University of Rome

Michalina Ko odziejczak, Nicolaus Copernicus University

Christian Jung, University Clinic Duesseldorf

Pietro Scicchitano, University of Bari

Fiorella Devito, University of Bari

Annapaola Zito, University of Bari

Michele Occhipinti, University of Insubria

Battistina Castiglioni, University of Insubria

Giuseppe Calveri, University of Insubria

Francesco Maisano, University of Zurich

Marco Ciccone, University of Bari

Stefano De Servi, Department of Cardiology Multimedica

*Disclaimer: The manuscript and its contents are confidential, intended for journal review purposes only, and not to be further disclosed.*

1  
2  
3  
4  
5  
6  
7  
8  
9  
10  
11  
12  
13  
14  
15  
16  
17  
18  
19  
20  
21  
22  
23  
24  
25  
26  
27  
28  
29  
30

**SURVIVAL BENEFITS OF INVASIVE VS. CONSERVATIVE STRATEGIES IN HEART FAILURE IN PATIENTS WITH  
REDUCED EJECTION FRACTION AND CORONARY ARTERY DISEASE**

Georg Wolff<sup>1,2</sup>, MD, MD; Dimitrios Dimitroulis<sup>1,2</sup>, MD; Felicita Andreotti<sup>1,3</sup>, MD, PhD, FESC; Michalina Kołodziejczak<sup>1,4</sup>, MD; Christian Jung, MD, PhD<sup>1,2</sup>; Pietro Scicchitano<sup>1,5</sup>, MD; Fiorella Devito<sup>1,5</sup>, MD; Annapaola Zito<sup>1,5</sup>, MD; Michele Occhipinti<sup>1,6</sup>, MD; Battistina Castiglioni<sup>6</sup>, MD; Giuseppe Calveri<sup>6</sup>, MD; Francesco Maisano<sup>7</sup>, MD; Marco M. Ciccone<sup>1,6</sup>, MD; Stefano De Servi, MD<sup>1,8</sup>; Eliano P. Navarese<sup>1,8</sup>, MD, PhD, FESC;

*1 Systematic Investigation and Research on Interventions and Outcomes (SIRIO) MEDICINE research network, Milan, Italy*  
*2 Department of Internal Medicine, Division of Cardiology, Pulmonology and Vascular Medicine, Heinrich-Heine-University, Düsseldorf, Germany; ; 3 Institute of Cardiology, Catholic University, Rome, Italy; 4 Collegium Medicum in Bydgoszcz, University of Nicolaus Copernicus, Toruń, Poland; 5 Department of Emergency and Organ Transplantation, Section of Cardiovascular Diseases, School of Medicine, University of Bari, Italy; 6 Department of Heart Science, Ospedale di Circolo e Fondazione Macchi, University of Insubria, Varese, Italy; 7 Department of Cardiosurgery, University of Zurich, Switzerland; 8 Department. of Cardiology, Multimedica IRCCS, Milan, Italy.*

**Correspondence to**

Eliano Pio Navarese, MD, PhD, FESC  
Department of Cardiology,  
Multimedica IRCCS  
Via Milanese 300, 20099 Milan, Italy  
Email: elianonavarese@gmail.com

31

32 **Abstract**

33 **Background:** Heart failure with reduced ejection fraction caused by ischemic heart disease is associated  
34 with increased morbidity and mortality. It remains unclear whether revascularization by either coronary  
35 artery bypass grafting (CABG) or percutaneous coronary intervention (PCI) carries benefits or risks in this  
36 group of stable patients compared to medical treatment (MT).

37 **Methods and Results:** We performed a meta-analysis of available studies comparing different methods of  
38 revascularization (PCI or CABG) against each other or MT in patients with coronary artery disease and left  
39 ventricular ejection fraction  $\leq 40\%$ . The primary outcome was all-cause mortality; myocardial infarction,  
40 revascularization, stroke were also analyzed. Twenty-one studies involving a total of 16,191 patients were  
41 included. Compared to MT there was a significant mortality reduction with CABG (hazard ratio (HR) 0.67  
42 [95% confidence interval (CI) 0.51 to 0.86];  $P < 0.001$ ) and PCI (HR 0.73, [CI 0.62 to 0.85];  $P < 0.001$ ).  
43 When compared to PCI, CABG still showed a survival benefit (HR 0.82 [CI 0.75 to 0.90];  $P < 0.001$ ).

44 **Conclusions:** The present meta-analysis indicates that revascularization strategies are superior to MT in  
45 improving survival in patients with ischemic heart disease and reduced ejection fraction. Between the two  
46 revascularization strategies, CABG appears more favourable compared to PCI in this particular clinical  
47 setting.

48

49 **Keywords:** CABG, PCI, heart failure, meta-analysis

50

51

52

53

54

55

56

57

58

59

60

61 **Commentary:**

62

63

Previous data have shown improved survival by revascularization with coronary artery bypass grafting (CABG) compared to medical treatment (MT) for patients with coronary artery disease (CAD) but single studies in the setting of CAD with heart failure and reduced ejection fraction (HFrEF) have been underpowered to draw definite conclusions, ultimately contributing to the uncertainty of current recommendations on the optimal strategy for patients with CAD and HFrEF. The present meta-analysis indicates that revascularization strategies are superior to MT in improving survival in patients with ischemic heart disease and reduced ejection fraction. Between the two revascularization strategies, CABG appears more favourable compared to PCI in this particular clinical setting. This large-scale article emphasizes in patients with HF and CAD the mortality benefits of revascularizations over medical therapy; these findings prompt an update of international guidelines with higher class and evidence of recommendations assigned to surgical revascularizations to these high-risk patients.

64

65

Disclaimer: The manuscript and its content are confidential, intended for journal review purposes only, and not to be further disclosed.

66 **Introduction**

67 Heart failure (HF) remains a major cause of morbidity and mortality worldwide [1-4]. With an incidence  
68 expected to rise steadily in the coming years, it represents an increasing public health issue.

69 Systolic heart failure, also termed heart failure with reduced ejection fraction (HFrEF), accounts for about  
70 50% of the overall HF burden [1,3,5]. HFrEF is commonly defined as a reduction in left ventricular ejection  
71 fraction to  $\leq 40\%$ , with coronary artery disease (CAD) causing approximately two-thirds of cases [1,6].  
72 Recurrent or prolonged ischemic events lead to maladaptive remodeling of cardiomyocytes and expanding  
73 extracellular matrix, culminating in cavity dilation and systolic dysfunction [7].

74 Previous studies have reported improved survival by revascularization with coronary artery bypass grafting  
75 (CABG) compared to medical treatment (MT) [8–10] for patients with CAD and HFrEF, with CABG  
76 becoming the recommended strategy; however, other potential therapeutic options currently include  
77 percutaneous coronary interventions (PCI) and intensified, evidence-based MT; moreover, single studies in  
78 the setting of HF have been underpowered to draw definite conclusions, ultimately contributing to the  
79 uncertainty of current recommendations on the optimal strategy for patients with CAD and HFrEF [1,3]. We  
80 aimed to perform an analysis of the totality of evidence of both randomized and observational studies  
81 evaluating the impact on mortality of available treatment options (CABG, PCI and MT) for patients with  
82 HFrEF and CAD.

83

84

85

## 86 **Materials and Methods**

### 87 **Data sources and search strategy**

88 The meta-analysis was performed according to established methods recommended by the Cochrane  
89 guidelines [11] and in compliance with the Preferred Reporting Items for Systematic Reviews and Meta-  
90 Analyses (PRISMA) statement for conducting systematic reviews and meta-analyses in health care  
91 interventions [12].

92 A systematic literature search of articles until 5<sup>th</sup> July 2016 was performed, using the medical databases  
93 MEDLINE, EMBASE, Google Scholar, Web of Science and the Cochrane Controlled Trials Register, as  
94 well as congress proceedings from major cardiovascular societies (ACC, AHA Scientific Sessions, ESC  
95 Congress). Search terms according to medical subjects headings included revascularization, impaired  
96 ejection fraction, left ventricular ejection fraction, severe left ventricular dysfunction, reduced ejection  
97 fraction, heart failure, ischemic cardiomyopathy, percutaneous coronary intervention, coronary artery bypass  
98 grafting, medical therapy. A bibliography search within landmark articles and guidelines of cardiac societies  
99 on the subject was additionally performed and relevant articles were added. Relevant citations were screened  
100 at the title/abstract level and retrieved as full text reports, where possible.

### 101 **Study design, selection criteria and outcome measures**

102 We designed the current meta-analysis to compare CABG, PCI and MT treatment strategies for patients with  
103 ejection fraction  $\leq 40\%$ . All randomized or observational trials comparing at least two of the three treatment  
104 modalities against each other with a minimum follow-up of 12 months and reporting all-cause mortality  
105 were eligible for inclusion. No language or publication status restriction was imposed. Exclusion criteria  
106 were: 1)  $< 12$  months of follow-up; 2) mortality not reported; 3) single-arm study.

107 The primary clinical endpoint was mortality; secondary endpoints were myocardial infarction (MI), repeat  
108 revascularization (RR), and stroke. Repeat revascularization was considered to be any revascularization,  
109 including target-vessel revascularization.

110

111 **Data abstraction and quality assessment**

112 The most updated or inclusive data for each study were used for abstraction. Two independent investigators  
113 (DD and GW), who were not personally involved in any of the included trials, abstracted data from each  
114 report into pre-specified forms. Data were abstracted according to the intention-to-treat principle, where  
115 possible. Internal validity was independently appraised by two investigators (DD and GW); divergences  
116 were resolved by discussion with a third investigator (EPN). Bias assessment was performed based on the  
117 Cochrane Handbook recommendations [11]. Additional sensitivity analyses were conducted to account for  
118 different types of emerging bias.

119

120 **Statistical analyses**

121 Presented data are time-to-event outcomes. For meta-analyses of these outcomes, the most appropriate  
122 statistic to use is the hazard ratio (HR), which takes into account both the number of events and the time to  
123 these events. Hazard ratio (HR) and 95% confidence intervals (CI) were derived from survival parameters in  
124 each study and used as summary statistics. Heterogeneity was assessed by the Cochran's Q test, and  
125 statistical heterogeneity was summarized by the  $I^2$  statistic, which quantifies the percent of variation in study  
126 results that is due to heterogeneity rather than to chance [13].  $I^2$  values  $>50\%$  indicate substantial  
127 heterogeneity. Pooled HR for all outcomes were calculated using the more conservative DerSimonian and  
128 Laird random-effects model [11,14].

129 To validate the overall analyses of the primary mortality outcome, three pre-specified sensitivity analyses  
130 were performed: namely, studies with matched patients only (either randomized or propensity-score-  
131 matched), studies comparing CABG against drug-eluting stent (DES)-PCI, and studies published in 2010 or  
132 later.

133 Statistical significance for the summary hazard ratios was assumed at a 2-tailed p-value  $<0.05$ .  
134 Comprehensive Meta-Analysis software, version 2 (Biostat, Englewood, New Jersey) was used for statistical  
135 analyses.



## 137 **Results**

### 138 **Study selection and patient populations**

139 Article screening and selection is described in a PRISMA flow chart (Figure 1). Of 1,108 articles retrieved  
140 from the primary searches using pre-specified keywords, 879 were excluded for unmet inclusion criteria.

141 Twenty-one studies published between 1983 and July 2016 were finally included in the meta-analysis (Table  
142 1), of which 16 available as full-text reports [10, 15-19, 21, 23-26, 29-35]. For the remaining 5 articles, data  
143 were abstracted from the study summaries [8,20,22,27-28]. Patient baseline characteristics are shown in  
144 Table 2. Of a total of 16,191 patients (mean age 64 years, 79% male), 7,335 underwent CABG, 4,439  
145 underwent PCI and 4,417 received MT. Three trials involving 1,779 patients had a randomized design, and  
146 six observational studies involving 2,611 patients used propensity-score- or case-control-matching,  
147 contributing to a total of 4,410 patients in randomized or matched groups. For papers reporting both crude  
148 and propensity-score-matched populations (Yang et al. [15] and Velasquez et al. [16]), these groups were  
149 included separately in the overall and sensitivity analyses. Median follow-up was 36 months. Only a  
150 minority of studies performed viability testing in over 50% of patients.

151 The risks of bias of the included randomized and observational studies are shown in Supplementary Table 1  
152 and Supplementary Table 2 respectively. Overall, bias was low across RCTs, and moderate in observational  
153 studies.

### 154 **Mortality with CABG, PCI or MT**

155 Eight studies, of which two had a randomized design [18,21], involved 6,896 patients and reported mortality  
156 with CABG compared to contemporary MT (Figure 2A). A statistically significant reduction in mortality  
157 was observed with the use of CABG, 31.91% (791 of 2,479 patients), compared to MT, 38.31% (1,692 of  
158 4,417 patients) (HR 0.67 [95% CI 0.51 to 0.86];  $P < 0.001$ ; heterogeneity  $P < 0.001$ ;  $I^2 = 77\%$ ).

159 Two studies involved 931 patients and compared PCI vs. MT (Figure 2B). A statistically significant  
160 mortality reduction was observed with PCI 34.70% (178 of 513 patients) compared to MT 46.41% (194 of  
161 418 patients) (HR 0.73 [95% CI 0.62 to 0.85];  $P < 0.001$ ; heterogeneity  $P = 0.96$ ;  $I^2 = 0\%$ ).

162 Sixteen studies involving 8,782 patients and including two RCTs compared CABG vs. PCI (Figure 2C).  
163 There was a statistically significant reduction in mortality with CABG compared with PCI; the respective  
164 mortality rates were 18.95% (920 of 4,856 patients) and 24.45% (960 of 3,926 patients) (HR 0.82 [95% CI  
165 0.75 to 0.90];  $P < 0.001$ ; heterogeneity  $P = 0.01$ ;  $I^2 = 47\%$ ).

166 A sensitivity analysis limited to the randomized or matched cohorts was performed (Supp. Fig. 1). The  
167 results of CABG vs. MT were confirmed by three studies [16,18,21] involving 1,779 patients (HR 0.75  
168 [95% CI 0.60 to 0.93];  $P = 0.01$ ; Supp. Fig. 1A). Seven studies [15,18,23,28–30,32] involving 2,656 patients  
169 confirmed the results on CABG vs. PCI (HR 0.86 [95% CI 0.77 to 0.96];  $P = 0.009$ ; Supp. Fig. 1B). Only  
170 one small randomized trial was available for the PCI vs. MT comparison (Supp. Fig. 1C).

171 To account for the procedural and pharmacological progress made over the last years, a sensitivity analysis  
172 including only studies published since 2010 was performed (Supp. Fig. 2). The survival benefit seen in the  
173 overall analysis for CABG vs. MT was confirmed by five studies [16,18–21] involving 3,366 patients (HR  
174 0.67 [95% CI 0.51 to 0.86];  $P = 0.002$ ; Supp. Fig. 2A), and for CABG vs. PCI by ten studies  
175 [15,18,20,22,24,27–29,32] involving 5,279 patients (HR 0.79 [95% CI 0.71 to 0.88];  $P < 0.001$ ; Supp. Fig.  
176 2B).

## 177 **Secondary endpoints with CABG vs. PCI**

### 178 *Myocardial infarction*

179 Eight studies with a total of 5,122 patients reported data on first or recurrent MI (Figure 3A). Treatment  
180 with CABG resulted in a statistically significant reduction in MI compared with PCI; rates were 2.11% (62  
181 of 2,938) and 4.26% (93 of 2,184) respectively (HR 0.50 [95% CI 0.36 to 0.68];  $P < 0.001$ ; heterogeneity  $P$   
182  $= 0.51$ ;  $I^2 = 0\%$ ).

183

184 *Repeat revascularization*

185 Seven studies, involving 3,886 patients, provided data on repeat revascularization [15,24,25,27,28,30–32]  
186 (Figure 3B). There was a statistically significant reduction in repeat revascularization with CABG compared  
187 with PCI treatment; the respective rates were 5.82% (116 of 1,991 patients) and 20.74% (371 of 1,788  
188 patients) (HR 0.34 [95% CI 0.24 to 0.47],  $P < 0.001$ ; heterogeneity  $P = 0.03$ ;  $I^2 = 57\%$ ).

189 *Stroke*

190 Four studies, comprising 2,113 patients, were included in the analysis of stroke (Figure 3C). The rates did  
191 not differ significantly between the two groups: 5.21% (58 of 1,112 patients) who underwent CABG and  
192 4.13% (37 of 894 patients) who underwent PCI (HR 0.79 [95% CI 0.52 to 1.18],  $P = 0.24$ ; heterogeneity  $P =$   
193  $0.76$ ;  $I^2 = 0\%$ ).

194

195 **CABG vs. PCI in patients stratified by disease or treatment characteristics**

196 We investigated whether CABG or PCI favored special patient populations, or patients preferably treated  
197 with drug-eluting stents (DES) in the PCI group.

198 Four studies, with a total of 987 patients, reported a prevalence of left main/proximal left anterior  
199 descending (LAD) disease  $>50\%$  in both groups (Figure 4A). Mortality was still significantly reduced with  
200 CABG vs. PCI, with respective rates of 17.08% (103 of 603 patients) and 25.0% (96 of 384 patients) (HR  
201  $0.76$  [CI 0.59 to 0.98],  $P = 0.03$ ; heterogeneity  $P = 0.96$ ;  $I^2 = 0\%$ ).

202 Seven studies involving 2,695 patients reported a prevalence of three-vessel-disease  $>50\%$  in both groups  
203 [18,23–25,28,31] (Figure 4B). The overall incidence of all-cause mortality did not differ significantly  
204 between the two revascularization strategies: 27.85% (379 of 1,361) among patients undergoing CABG and  
205 30.51% (407 of 1,334) among patients who underwent PCI (HR 0.92 [CI 0.82 to 1.03],  $P = 0.16$ ;  
206 heterogeneity  $P = 0.66$ ;  $I^2 = 0\%$ ).

207 Six studies comprising 4,827 patients used only DES in the PCI group, allowing a comparison of CABG  
208 against contemporary PCI (Figure 4C). Revascularization by CABG still resulted in a statistically significant  
209 reduction of all-cause mortality compared with revascularization by PCI, with respective rates of 13.73%  
210 (380 of 2,767) and 16.70% (344 of 2,060) (HR 0.82 [CI 0.69 to 0.96], P = 0.01; heterogeneity P = 0.79; I<sup>2</sup> =  
211 0%).

## 212 **Discussion**

213 The present article, to the best of our knowledge, represents the largest evidence base comparing mortality  
214 outcome after surgical, percutaneous or conservative treatment of heart failure patients with reduced ejection  
215 fraction and coronary artery disease. The main findings of this analysis are that: a) revascularization with  
216 either CABG or PCI carried a significant improvement in long-term survival over MT; b) CABG showed a  
217 significantly improved survival compared to PCI, that persisted among patients with left main/proximal  
218 LAD disease and in studies conducted after the advent of DES; c) CABG compared to PCI was associated  
219 with a significant reduction in the risk of myocardial infarction or need for repeat revascularization, albeit  
220 with a numerically higher rate of stroke.

221 There are potential anatomical and functional reasons for the described different mortality rates among the  
222 investigated patients cohorts: 1) a complete revascularization can be more frequently reached with CABG  
223 than with PCI[36]; completeness of revascularization by removing the ischemic burden might be a pivotal  
224 driver of improved prognosis, in particular in high-risk patients with HF caused by ischemic coronary artery  
225 disease (CAD). Although in the last years advances have been made in MT, the results on clinical outcomes  
226 offered by a complete revascularization could not be equalized by the sole MT in the high-risk subset with  
227 HF and reduced ejection fraction. 2) In HF patients CAD tends to be more complex and diffuse, leading to  
228 higher need for repeated revascularisations and myocardial infarction rates after coronary stenting than with  
229 CABG[37-38]. 3) CABG revascularizing prolonged epicardial segments vs. PCI only specific stenotic lesion  
230 can yield a better vessel patency with a graft vs. a stented native vessel often extensively diseased in  
231 ischemic HF; 4) in HF patients with low cardiac reserve, it is conceivable that in-stent restenosis would be  
232 more negatively impacting in this group than in others without severe dysfunction. 5) Improved survival

233 after CABG could be related to fewer lethal ventricular arrhythmias or to reverse remodeling. The risk of  
234 contrast induced acute nephropathy (CI-AKI) after PCI is also increased in more complex patients with HF  
235 and reduced ejection fraction, potentially contributing to higher mortality rates as compared to CABG [39].  
236 Findings from early randomized trials comparing medical therapy to CABG for the treatment of stable  
237 angina cannot be automatically extrapolated to the care of coronary artery disease patients with heart failure,  
238 since this is a specific population that was largely excluded from the early stable angina trials [21]. The only  
239 randomized trial specifically addressing heart failure patients is STICH, with its recently published 10-year  
240 extended follow-up (STICHES) [33]. For similar reasons, the randomized trials comparing PCI to CABG in  
241 CAD patients have failed to provide definite answers regarding patients with comorbid heart failure. Indeed,  
242 only approximately 2% of patients enrolled in the SYNTAX (Synergy Between Percutaneous Coronary  
243 Intervention With Taxus and Cardiac Surgery) trial had LVEF <30% [40]. More recently, the NHLBI-  
244 sponsored FREEDOM (Future Revascularization Evaluation in Patients With Diabetes Mellitus: Optimal  
245 Management of Multivessel Disease) trial reported similar outcomes with PCI using drug-eluting stents and  
246 CABG in patients with LVEF <40%, but only 32 patients (2.5%) were in this pre-specified subgroup [41].  
247 Thus, the available randomized data comparing PCI and CABG in patients with severe left ventricular  
248 dysfunction are insufficient.

249 Current guidelines from the American and European cardiac societies are not uniform with respect to the  
250 class and level of treatment recommendations for CAD patients with HFREF. The European Society of  
251 Cardiology (ESC) guidelines recommend CABG over PCI for patients with HFREF and significant CAD in  
252 the presence of angina or viable myocardium [42]. PCI receives IIb C strength of recommendations for  
253 patients unsuitable for surgery, who have viable myocardium or significant left main stenosis or two/three  
254 vessel disease. ACCF/AHA guidelines take a more liberal approach, suggesting CABG or PCI in patients  
255 with left-main or multivessel disease in the case of angina and suitable coronary anatomy [3]. However, for  
256 patients with severely impaired left ventricular function and significant CAD in the absence of angina, only  
257 CABG is recommended as an alternative to MT, even in absence of myocardial viability (Class IIb, Level of  
258 Evidence B) [3]. The discrepancy among international recommendations, stemming from the lack of  
259 evidence from adequately powered randomized trials, challenges physicians in choosing the optimal strategy

260 [1,3,42,43]. Our findings derived from a large scale analysis agree with those from STICH, unequivocally  
261 supporting the revascularization option in this high-risk group of patients. Our data for the first time add  
262 comprehensive information on the efficacy of percutaneous revascularization vs. medical therapy, providing  
263 evidence that revascularization, irrespective of modality, in this specific population has the potential to  
264 improve the patients' outcomes. Moreover, they further expand current evidence by investigating the  
265 comparison between surgical and percutaneous revascularization, with a consistent long-term survival  
266 benefit provided by the surgical revascularization strategy. According to our meta-analysis and to the results  
267 of the STICH trial, surgical revascularization should be regarded as the preferred revascularization modality  
268 in these high-risk patients, followed by percutaneous interventions. These results suggest that current  
269 international guidelines should upgrade CABG to receive a higher class of recommendation and a higher  
270 level of evidence over PCI or MT.

271 An interesting finding of our study is that a significant mortality reduction is observed not only for patients  
272 with a classical indication for surgical revascularization (left main disease or three-vessel-disease), but  
273 possibly for all patients with significant CAD and impaired left ventricular function.

274 The comparison of CABG and PCI in patients with HFrEF shows a significant survival benefit for CABG in  
275 the present analysis. The low heterogeneity and the narrow 95% confidence intervals suggest consistency of  
276 the findings that remained statistically significant in the subanalyses of CABG vs. PCI using DES, and of  
277 the randomized/matched cohorts. The reduction in mortality, however, was numerically smaller for CABG  
278 vs. PCI than for CABG vs. MT, in line with the findings of the present article on the benefits of PCI over  
279 MT. In a subanalysis of secondary endpoints, we found significantly reduced risk for myocardial infarction  
280 and repeat revascularization in patients treated with CABG vs. PCI.

281 Although left main and three-vessel disease have long been a domain of CABG rather than PCI for  
282 revascularization, due to an established prognostic benefit of CABG, three recent randomized trials, LE  
283 MANS [44], SYNTAX [45] and PRECOMBAT [46], and subsequent meta-analyses [47] have suggested  
284 that intermediate-term mortality after interventional revascularization using modern stent systems is  
285 comparable to CABG, with a reduced risk of stroke but a higher need for repeat revascularization.

286 Revascularization guidelines [42,43] have thus expanded PCI indications in stable coronary heart disease,  
287 leaving the sole CABG recommendation to complex coronary anatomy with high SYNTAX scores and/or  
288 diabetes mellitus [48,49]. Our findings indicate that surgical revascularization in patients with heart failure  
289 and reduced ejection fraction should be regarded as the preferred strategy, with significant survival benefits  
290 in patients with left main/proximal LAD disease and a numerical but non-significant mortality reduction in  
291 patients with three vessel disease.

292 Another important finding of the present report is that the significant survival improvement with CABG  
293 over MT or PCI occurred in patients largely without previous viability testing. The indication for  
294 revascularization in patients with heart failure with reduced ejection fraction is most often based on clinical  
295 symptoms, e.g. angina or decompensation, in the presence of significant CAD. The relevance of myocardial  
296 viability testing to determine the benefit/risk ratio of revascularization remains uncertain, with only a  
297 minority of studies providing signal for possible benefit [50] and guidelines generally recommending it as a  
298 reasonable procedure [1,3]. European guidelines clearly advise against revascularization with either CABG  
299 or PCI in patients who have neither angina nor viable myocardium [1,40]. American guidelines instead take  
300 a differing approach, giving a IIB-recommendation to CABG, independent of viable myocardium [3]. The  
301 present meta-analysis of all available studies on the topic shows a clear survival benefit for revascularization  
302 techniques (CABG as well as PCI) compared to MT, largely independent of viability testing. Our results are  
303 thus in line with current recommendations from American guidelines with respect to this point, and suggest  
304 a minor role of viability testing in CAD patients with heart failure and associated reduced ejection fraction.

305 In conclusion, this large-scale article emphasizes in patients with HF and CAD the mortality benefits of  
306 revascularizations over medical therapy; these findings prompt an update of international guidelines, with  
307 higher class and evidence of recommendations assigned to surgical revascularizations to these high-risk  
308 patients.

### 309 **Limitations**

310 The availability of individual patient data would have improved the results of our meta-analysis, especially  
311 of potential subgroup analyses. Only few RCTs were available, with the majority of studies being

312 observational. The observational design has the advantage of adhering to the real world, more appropriately  
313 reflecting current practice of unselected higher risk patients vs. those derived from randomized trials.  
314 Nonetheless, a number of sensitivity analyses were performed, including those limited to patients  
315 randomized or well matched, and were consistent with the main findings, suggesting that the overall effect is  
316 justified.

317 Data on single treatments in the medical therapy group were available only in a minority of studies,  
318 therefore precise description of the adherence to standard guidelines for medical therapy in this patient  
319 cohort is not possible. On the other hand, a sensitivity analysis done with the more contemporary studies  
320 only confirmed the overall results. Moreover, additional sensitivity analyses in studies using randomization  
321 or patient matching have been conducted, generating highly matched patients in terms of allocated medical  
322 treatments; the findings are directionally convergent and have consistent magnitude with the main findings.  
323 Caution should be prompted when interpreting subgroup analyses that should be regarded as exploratory,  
324 given the degree of variability in patient background characteristics.

### 325 **Conclusions**

326 This meta-analysis provides evidence that revascularization, irrespective of modality, compared with  
327 medical therapy, significantly improves survival and other outcomes in patients with ejection fraction  $\leq 40\%$   
328 and significant CAD. CABG seems to be the most favorable option in this setting, although PCI may have  
329 its advantages in special patients and situations. Careful assessment of procedural risk and discussion of the  
330 optimal treatment strategy within a heart team is mandatory and recommended by current guidelines.  
331 Additional randomized trials will be necessary to further define the most beneficial treatment for these high-  
332 risk patients.

### 333 **Disclosures**

334 None.



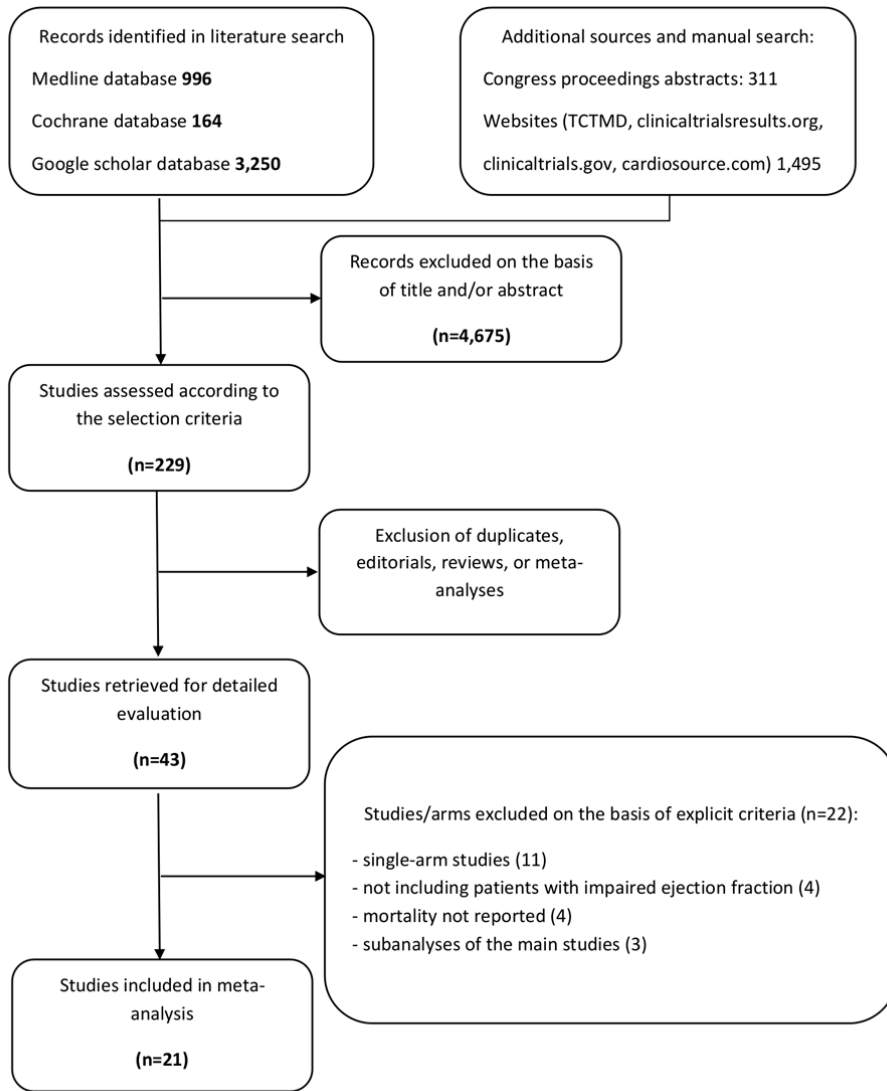

Disclaimer:  
confidential, in-  
only, and

ents are  
w purposes  
closed.

Figure 2

A) Mortality in studies comparing CABG versus MT

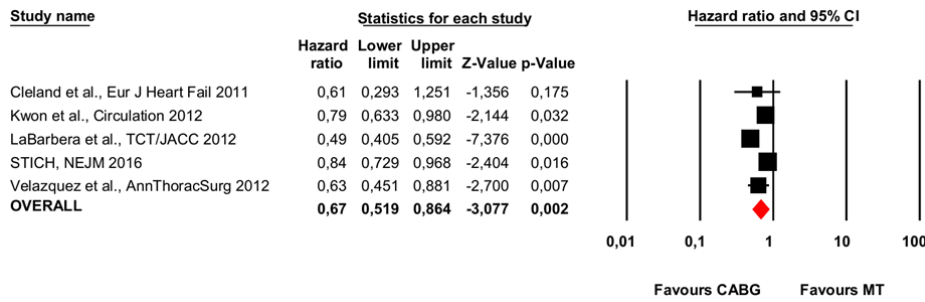

B) Mortality in studies comparing PCI versus MT

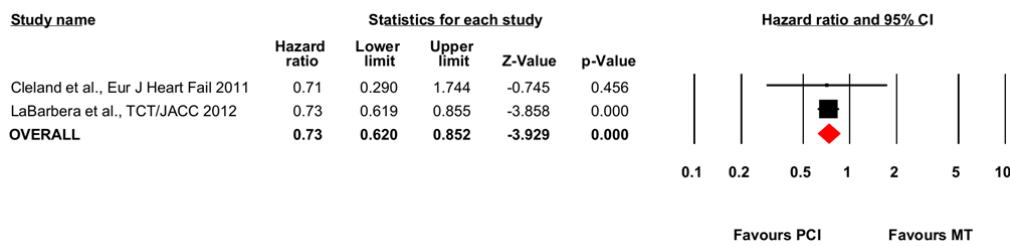

C) Mortality in studies comparing CABG versus PCI

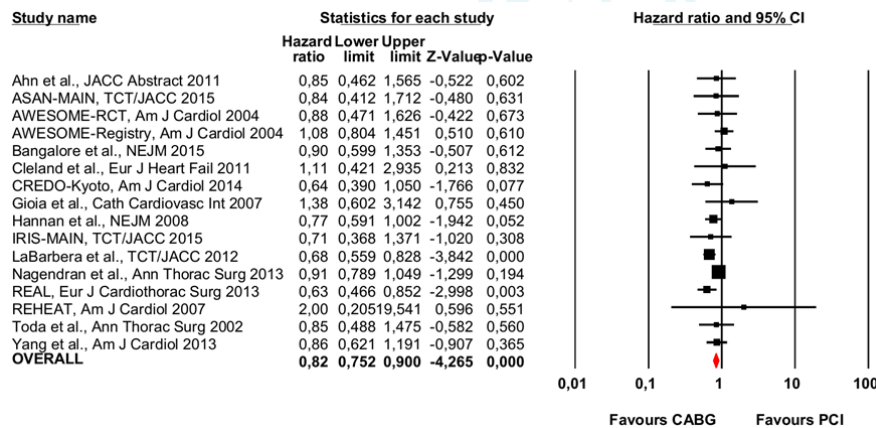

Figure 2: Individual and summary hazard ratios for mortality of studies stratified by treatment comparison: A) CABG vs. MT; B) PCI vs. MT; C) CABG vs. PCI.

Figure 3

A) Myocardial infarction in studies comparing CABG versus PCI

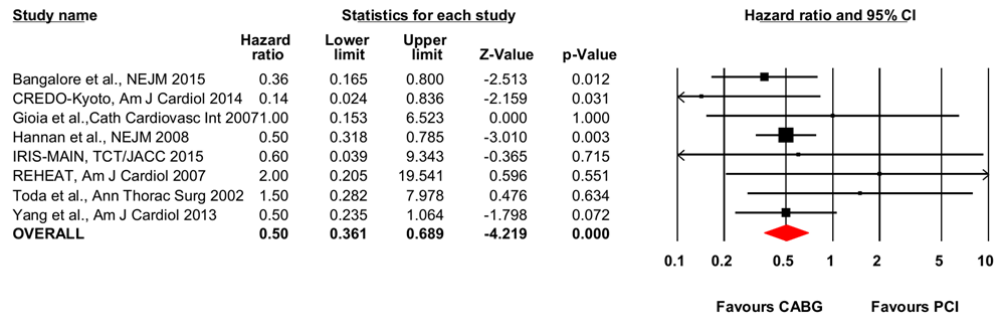

B) Repeat revascularization in studies comparing CABG versus PCI

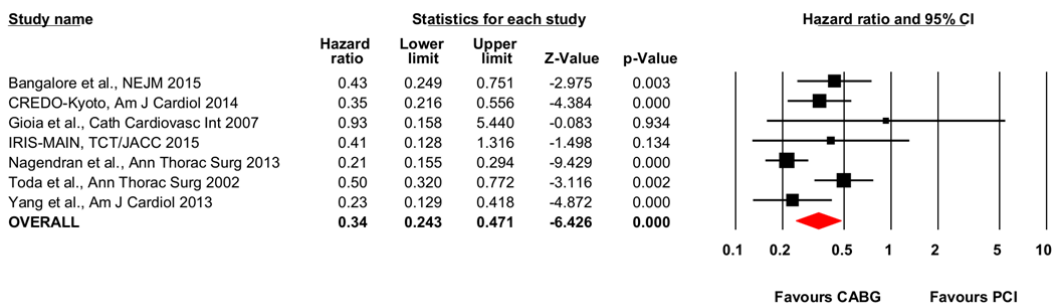

C) Stroke in studies comparing CABG versus PCI

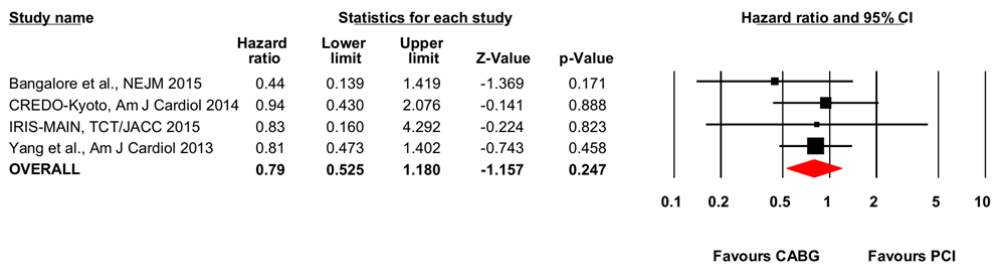

Figure 3: Individual and summary hazard ratios for secondary endpoints of studies comparing CABG versus PCI: A) Myocardial infarction; B) Repeat revascularization; C) Stroke.

Figure 4

A) Mortality in studies comparing CABG versus PCI in patients with left main/proximal LAD disease

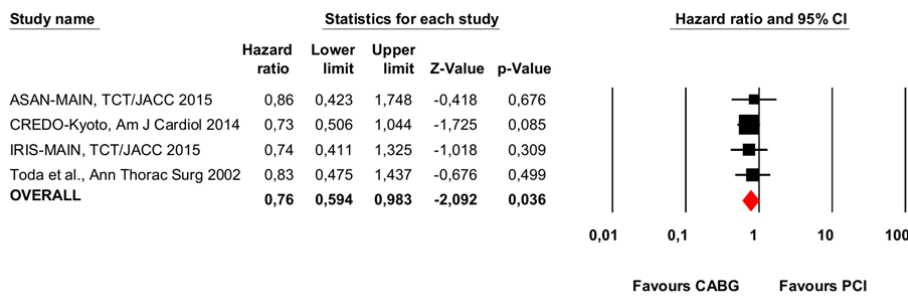

B) Mortality in studies comparing CABG versus PCI in patients with three-vessel-disease

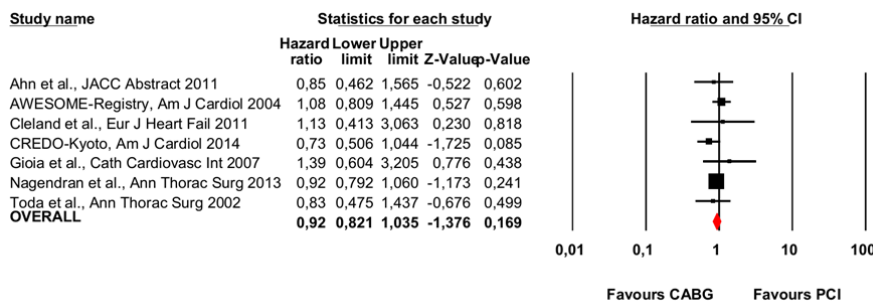

C) Mortality in studies comparing CABG versus PCI, with drug-eluting stents in the PCI group

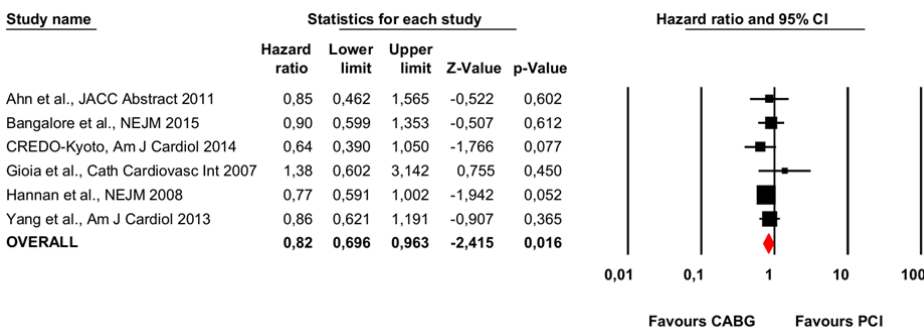

Figure 4: Individual and summary hazard ratios for mortality in studies comparing CABG versus PCI stratified by patient characteristics or treatment: A) in patients with left main/proximal LAD disease; B) in patients with three-vessel-disease; C) in studies using drug-eluting stents in the PCI group.

**Table 1. Characteristics of included studies**

| Study                 | Year | Type         | Patients (total) | Comparison        | FU (months) | Reported outcomes                                                              |
|-----------------------|------|--------------|------------------|-------------------|-------------|--------------------------------------------------------------------------------|
| Ahn et al. [34]       | 2011 | Registry     | 327              | CABG vs PCI       | 36          | Mortality, major adverse cardiac or cerebrovascular events                     |
| Appoo et al. [17]     | 2004 | Registry     | 2169             | CABG vs MT        | 12          | Mortality                                                                      |
| ASAN-MAIN [22]        | 2015 | Registry     | 213              | CABG vs PCI       | 24          | Mortality                                                                      |
| AWESOME [23,35]       | 2004 | RCT/Registry | 386              | CABG vs PCI       | 36          | Mortality, survival free of angina, RR                                         |
| Bangalore et al. [32] | 2015 | Registry     | 396              | CABG vs PCI       | 35          | Mortality, MI, stroke, RR                                                      |
| Bounous et al.[8]     | 1988 | Registry     | 710              | CABG vs MT        | 36          | Mortality                                                                      |
| CASS [10]             | 1983 | Registry     | 651              | CABG vs MT        | 36          | Mortality, functional limitation                                               |
| Cleland et al. [18]   | 2011 | RCT          | 109              | CABG vs PCI vs MT | 59          | Mortality                                                                      |
| CREDO-Kyoto [24]      | 2014 | Registry     | 293              | CABG vs PCI       | 60          | Mortality, cardiac mortality, sudden death, readmission for HF, stroke, MI, RR |
| Gioia et al. [25]     | 2007 | Registry     | 220              | CABG vs PCI       | 15          | Mortality, cardiac mortality, MI, TVR, NYHA                                    |
| Hannan et al. [26]    | 2008 | Registry     | 2673             | CABG vs PCI       | 18          | Mortality, MI                                                                  |
| IRIS-MAIN [27]        | 2015 | Registry     | 364              | CABG vs PCI       | 12          | Mortality, cardiac mortality, MI, RR, TVR, stroke                              |
| Kwon et al. [19]      | 2012 | Registry     | 450              | CABG vs MT        | 70          | Mortality                                                                      |
| LaBarbera et al. [20] | 2012 | Registry     | 1345             | CABG vs PCI vs MT | 60          | Mortality                                                                      |
| Nagendran et al. [28] | 2013 | Registry     | 1436             | CABG vs PCI       | 180         | Mortality, RR                                                                  |
| REAL [29]             | 2013 | Registry     | 296              | CABG vs PCI       | 60          | Mortality                                                                      |

|                              |           |                    |      |             |     |                                               |
|------------------------------|-----------|--------------------|------|-------------|-----|-----------------------------------------------|
| <b>REHEAT [30]</b>           | 2007      | Case-control-study | 107  | CABG vs PCI | 12  | Mortality, MI, arrhythmia, angina, RR, stroke |
| <b>STICH/STICHES [21,33]</b> | 2011/2016 | RCT                | 1212 | CABG vs MT  | 118 | Mortality, cardiovascular mortality           |
| <b>Toda et al. [31]</b>      | 2002      | Registry           | 117  | CABG vs PCI | 36  | Mortality, MI, TVR, heart failure             |
| <b>Velazquez et al. [16]</b> | 2012      | Registry           | 763  | CABG vs MT  | 120 | Mortality                                     |
| <b>Yang et al. [15]</b>      | 2013      | Registry           | 953  | CABG vs PCI | 28  | Mortality, MI, stroke, RR, TVR                |

**Table 1:** Characteristics of included studies. MT=medical therapy, PCI=percutaneous coronary intervention, RCT=randomized controlled trial, FU=follow-up, MI=myocardial infarction, RR=repeat revascularization, TVR=target vessel revascularization, CABG=coronary artery bypass graft.

Disclaimer: The manuscript and its contents are confidential, intended for journal review purposes only, and not to be further disclosed.

**Table 2. Baseline patient characteristics**

| Study                 | Age<br>(y) | Male<br>(%) | HTN<br>(%) | DM<br>(%) | HLP<br>(%) | CKD<br>(%) | Prior CABG<br>(%) | Prior PCI<br>(%) | Prior MI<br>(%) | DES use<br>>50% | Left main/prox. LAD<br>>50% | 3-vessel disease<br>>50% | Viability test<br>>50% |
|-----------------------|------------|-------------|------------|-----------|------------|------------|-------------------|------------------|-----------------|-----------------|-----------------------------|--------------------------|------------------------|
| Ahn et al. [34]       | -          | -           | -          | -         | -          | -          | -                 | -                | -               | yes             | no                          | yes                      | no                     |
| Appoo et al. [17]     | 64         | 85          | 50         | 26        | 39         | 4          | 12                | 8                | 61              | no              | no                          | no                       | no                     |
| ASAN-MAIN [22]        | -          | -           | -          | -         | -          | -          | -                 | -                | -               | no              | yes                         | no                       | no                     |
| AWESOME [23,35]       | 65         | -           | 66         | 33        | -          | -          | 29                | 23               | -               | no              | no                          | yes                      | no                     |
| Bangalore et al. [32] | 65         | 72          | -          | 40        | -          | 5          | 0                 | -                | 41              | yes             | no                          | no                       | no                     |
| Bounous et al.[8]     | -          | -           | -          | -         | -          | -          | -                 | -                | -               | no              | no                          | no                       | no                     |
| CASS [10]             | 55         | 89          | -          | -         | -          | -          | -                 | -                | -               | no              | no                          | yes                      | no                     |
| Cleland et al. [18]   | 67         | 93          | 50         | 36        | 59         | -          | 8                 | 8                | 73              | no              | no                          | yes                      | yes                    |
| CREDO-Kyoto [24]      | 69         | 77          | 87         | 57        | -          | 11         | -                 | -                | 44              | yes             | yes                         | yes                      | no                     |
| Gioia et al. [25]     | 68         | 81          | 69         | 43        | 68         | -          | 17                | 20               | 56              | yes             | no                          | yes                      | no                     |
| Hannan et al. [26]    | 66         | 70          | -          | -         | 36         | 4          | -                 | -                | 42              | yes             | no                          | no                       | no                     |
| IRIS-MAIN [27]        | 66         | 79          | -          | -         | -          | -          | -                 | -                | -               | no              | yes                         | no                       | no                     |
| Kwon et al. [19]      | 63         | 74          | 51         | 37        | 49         | -          | 20                | -                | -               | no              | no                          | no                       | yes                    |
| LaBarbera et al. [20] | -          | -           | -          | -         | -          | -          | -                 | -                | -               | no              | no                          | no                       | no                     |
| Nagendran et al.[28]  | 65         | 81          | 63         | 34        | 62         | 5          | 6                 | 8                | 66              | no              | no                          | yes                      | no                     |

|                              |    |    |    |    |    |    |    |    |    |     |     |     |     |
|------------------------------|----|----|----|----|----|----|----|----|----|-----|-----|-----|-----|
| <b>REAL [29]</b>             | -  | 78 | 78 | 26 | -  | 5  | -  | -  | 29 | no  | no  | no  | no  |
| <b>REHEAT [30]</b>           | 61 | 77 | 62 | 25 | 66 | -  | -  | -  | 62 | no  | no  | no  | yes |
| <b>STICH/STICHES [21,33]</b> | 60 | 88 | 60 | 40 | 60 | 8  | 3  | -  | 77 | no  | yes | yes | no  |
| <b>Toda et al. [31]</b>      | 64 | 74 | -  | 42 | -  | 3  | 20 | 26 | 23 | no  | yes | yes | no  |
| <b>Velazquez et al. [16]</b> | 64 | 75 | -  | 34 | -  | 4  | 30 | 21 | 39 | no  | no  | no  | no  |
| <b>Yang et al. [15]</b>      | 66 | 76 | 60 | 50 | 27 | 13 | 5  | 25 | 29 | yes | no  | no  | no  |

**Table 2:** Baseline patient characteristics of all included studies. HTN=hypertension, DM=diabetes mellitus, HLP=hyperlipoproteinemia, CKD=chronic kidney disease, CABG=coronary artery bypass graft, PCI=percutaneous coronary intervention, MI=myocardial infarction, DES=drug-eluting stent, LAD=left anterior descending artery.



## References

1. McMurray JJV, Adamopoulos S, Anker SD, Auricchio A, Böhm M, Dickstein K, Falk V, Filippatos G, Fonseca C, Gomez-Sanchez MA, Jaarsma T, Køber L, Lip GY, Maggioni AP, Parkhomenko A, Pieske BM, Popescu BA, Rønnevik PK, Rutten FH, Schwitter J, Seferovic P, Stepinska J, Trindade PT, Voors AA, Zannad F, Zeiher A; ESC Committee for Practice Guidelines. ESC Guidelines for the diagnosis and treatment of acute and chronic heart failure 2012: The Task Force for the Diagnosis and Treatment of Acute and Chronic Heart Failure 2012 of the European Society of Cardiology. Developed in collaboration with the Heart Failure Association (HFA) of the ESC. *Eur Heart J*. 2012;33: 1787–1847.
2. Mozaffarian D, Benjamin EJ, Go AS, Arnett DK, Blaha MJ, Cushman M, de Ferranti S, Després JP, Fullerton HJ, Howard VJ, Huffman MD, Judd SE, Kissela BM, Lackland DT, Lichtman JH, Lisabeth LD, Liu S, Mackey RH, Matchar DB, McGuire DK, Mohler ER 3rd, Moy CS, Muntner P, Mussolino ME, Nasir K, Neumar RW, Nichol G, Palaniappan L, Pandey DK, Reeves MJ, Rodriguez CJ, Sorlie PD, Stein J, Towfighi A, Turan TN, Virani SS, Willey JZ, Woo D, Yeh RW, Turner MB; American Heart Association Statistics Committee and Stroke Statistics Subcommittee. Heart Disease and Stroke Statistics—2015 Update: A Report From the American Heart Association. *Circulation*. 2015;131(4):e29-322.
3. Yancy CW, Jessup M, Bozkurt B, Butler J, Casey DE Jr, Drazner MH, Fonarow GC, Geraci SA, Horwich T, Januzzi JL, Johnson MR, Kasper EK, Levy WC, Masoudi FA, McBride PE, McMurray JJ, Mitchell JE, Peterson PN, Riegel B, Sam F, Stevenson LW, Tang WH, Tsai EJ, Wilkoff BL; American College of Cardiology Foundation/American Heart Association Task Force on Practice Guidelines. 2013 ACCF/AHA Guideline for the Management of Heart Failure A Report of the American College of Cardiology Foundation/American Heart Association Task Force on Practice Guidelines. *Circulation*. 2013;128: e240–e327.
4. Mosterd A, Hoes AW. Clinical epidemiology of heart failure. *Heart Br Card Soc*. 2007;93: 1137–1146.
5. Owan TE, Redfield MM. Epidemiology of diastolic heart failure. *Prog Cardiovasc Dis*. 2005;47: 320–332.
6. Gheorghiade M, Bonow RO. Chronic Heart Failure in the United States A Manifestation of Coronary Artery Disease. *Circulation*. 1998;97: 282–289.
7. Sutton MGSJ, Sharpe N. Left Ventricular Remodeling After Myocardial Infarction Pathophysiology and Therapy. *Circulation*. 2000;101: 2981–2988.
8. Bounous EP, Mark DB, Pollock BG, Hlatky MA, Harrell FE Jr, Lee KL, Rankin JS, Wechsler AS, Pryor DB, Califf RM. Surgical survival benefits for coronary disease patients with left ventricular dysfunction. *Circulation*. 1988;78: 1151–1157.
9. Killip T, Passamani E, Davis K. Coronary artery surgery study (CASS): a randomized trial of coronary bypass surgery. Eight years follow-up and survival in patients with reduced ejection fraction. *Circulation*. 1985;72: V102–109.
10. Alderman EL, Fisher LD, Litwin P, Kaiser GC, Myers WO, Maynard C, Levine F, Schloss M. Results of coronary artery surgery in patients with poor left ventricular function (CASS). *Circulation*. 1983;68: 785–795.

11. The Cochrane Collaboration. Cochrane Handbook for Systematic Reviews of Interventions | Cochrane Community (beta). In: The Cochrane Collaboration [Internet]. 2011 [cited 20 Feb 2016]. Available: <http://community.cochrane.org/handbook>
12. Liberati A, Altman DG, Tetzlaff J, Mulrow C, Gøtzsche PC, Ioannidis JP, Clarke M, Devereaux PJ, Kleijnen J, Moher D. The PRISMA statement for reporting systematic reviews and meta-analyses of studies that evaluate healthcare interventions: explanation and elaboration. *BMJ*. 2009;339: b2700.
13. Higgins JPT, Thompson SG, Deeks JJ, Altman DG. Measuring inconsistency in meta-analyses. *BMJ*. 2003;327: 557–560.
14. DerSimonian R, Laird N. Meta-analysis in clinical trials. *Control Clin Trials*. 1986;7: 177–188.
15. Yang JH, Choi S-H, Song YB, Hahn JY, Choi JH, Jeong DS, Sung K, Kim WS, Lee YT, Gwon HC. Long-term outcomes of drug-eluting stent implantation versus coronary artery bypass grafting for patients with coronary artery disease and chronic left ventricular systolic dysfunction. *Am J Cardiol*. 2013;112: 623–629.
16. Velazquez EJ, Williams JB, Yow E, Shaw LK, Lee KL, Phillips HR, O'Connor CM, Smith PK, Jones RH. Long-term survival of patients with ischemic cardiomyopathy treated by coronary artery bypass grafting versus medical therapy. *Ann Thorac Surg*. 2012;93: 523–530.
17. Appoo J, Norris C, Merali S, Graham MM, Koshal A, Knudtson ML, Ghali WA. Long-term outcome of isolated coronary artery bypass surgery in patients with severe left ventricular dysfunction. *Circulation*. 2004;110: II13–17.
18. Cleland JGF, Calvert M, Freemantle N, Arrow Y, Ball SG, Bonser RS, Chattopadhyay S, Norell MS, Pennell DJ, Senior R. The Heart Failure Revascularisation Trial (HEART). *Eur J Heart Fail*. 2011;13: 227–233.
19. Kwon DH, Hachamovitch R, Popovic ZB, Starling RC, Desai MY, Flamm SD, Lytle BW, Marwick TH. Survival in patients with severe ischemic cardiomyopathy undergoing revascularization versus medical therapy: association with end-systolic volume and viability. *Circulation*. 2012;126: S3–8.
20. LaBarbera M, Hui P, Shaw R. Coronary artery disease in patients with reduced left ventricular systolic function treated with medicine, surgery, or percutaneous coronary intervention: a retrospective review of outcomes within a multicenter healthcare system. *J Am Coll Cardiol TCT Abstr*. 2012;
21. Velazquez EJ, Lee KL, Deja MA, Jain A, Sopko G, Marchenko A, Ali IS, Pohost G, Gradinac S, Abraham WT, Yii M, Prabhakaran D, Szwed H, Ferrazzi P, Petrie MC, O'Connor CM, Panchavinnin P, She L, Bonow RO, Rankin GR, Jones RH, Rouleau JL; STICH Investigators. Coronary-Artery Bypass Surgery in Patients with Left Ventricular Dysfunction. *N Engl J Med*. 2011;364: 1607–1616.
22. Kim MS, Kang SH, Park H, Bae BJ, Cheon SS, Roh JH, Lee PH, Chang M, Park HW, Yoon SH, Ahn JM, Park DW, Kang SJ, Lee SW, Kim YH, Lee CW, Park SW, Park SJ. Left Main Revascularization for Patients with Reduced Left Ventricular Ejection Fraction; Comparison of Outcome After PCI Versus CABG from ASAN-MAIN Registry. *J Am Coll Cardiol TCT Abstr*. 2015; A-035
23. Sedlis SP, Ramanathan KB, Morrison DA, Sethi G, Sacks J, Henderson W; Department of Veterans Affairs Cooperative Study #385, Angina With Extremely Serious Operative Mortality

Evaluation (AWESOME) Investigators.. Outcome of percutaneous coronary intervention versus coronary bypass grafting for patients with low left ventricular ejection fractions, unstable angina pectoris, and risk factors for adverse outcomes with bypass (the AWESOME Randomized Trial and Registry). *Am J Cardiol.* 2004;94: 118–120.

24. Marui A, Kimura T, Nishiwaki N, Mitsudo K, Komiya T, Hanyu M, Shiomi H, Tanaka S, Sakata R; CREDO-Kyoto PCI/CABG Registry Cohort-2 Investigators.. Comparison of five-year outcomes of coronary artery bypass grafting versus percutaneous coronary intervention in patients with left ventricular ejection fractions  $\leq 50\%$  versus  $> 50\%$  (from the CREDO-Kyoto PCI/CABG Registry Cohort-2). *Am J Cardiol.* 2014;114: 988–996.
25. Gioia G, Matthai W, Gillin K, Dralle J, Benassi A, Gioia MF, White J. Revascularization in severe left ventricular dysfunction: outcome comparison of drug-eluting stent implantation versus coronary artery by-pass grafting. *Catheter Cardiovasc Interv.* 2007;70: 26–33.
26. Hannan EL, Wu C, Walford G, Culliford AT, Gold JP, Smith CR, Higgins RS, Carlson RE, Jones RH. Drug-eluting stents vs. coronary-artery bypass grafting in multivessel coronary disease. *N Engl J Med.* 2008;358: 331–341.
27. Park H-S, Roh J-H, Lee PH, Chang M, Yoon S-H, Ahn J-M, Lee B-K, Kang S-J, Park D-W, Lee S-W, Kim Y-H, Lee CW, Park S-W, Park S-J. Percutaneous Coronary Intervention versus Coronary-Artery Bypass Grafting for Left Main Coronary Disease with Reduced Left Ventricular Ejection Fraction. *J Am Coll Cardiol TCT Abstr.* 2015; TCT-481
28. Nagendran J, Norris CM, Graham MM, Ross DB, Macarthur RG, Kieser TM, Maitland AM, Southern D, Meyer SR; APPROACH Investigators. Coronary revascularization for patients with severe left ventricular dysfunction. *Ann Thorac Surg.* 2013;96: 2038–2044.
29. Fortuna D, Nicolini F, Guastaroba P, De Palma R, Di Bartolomeo S, Saia F, Pacini D, Grilli R; RERIC (Regional Registry of Cardiac Surgery); REAL (Regional Registry of Coronary Angioplasties) Investigators. Coronary artery bypass grafting vs percutaneous coronary intervention in a “real-world” setting: a comparative effectiveness study based on propensity score-matched cohorts. *Eur J Cardiothorac Surg.* 2013;44: e16–24.
30. Buszman P, Szkróbka I, Gruszka A, Parma R, Tendera Z, Leško B, Wilczyński M, Bochenek T, Wojakowski W, Bochenek A, Tendera M. Comparison of effectiveness of coronary artery bypass grafting versus percutaneous coronary intervention in patients with ischemic cardiomyopathy. *Am J Cardiol.* 2007;99: 36–41.
31. Toda K, Mackenzie K, Mehra MR, DiCorte CJ, Davis JE, McFadden PM, Ochsner JL, White C, Van Meter CH Jr. Revascularization in severe ventricular dysfunction ( $15\% < \text{OR} = \text{LVEF} < \text{OR} = 30\%$ ): a comparison of bypass grafting and percutaneous intervention. *Ann Thorac Surg.* 2002;74: 2082–2087; discussion 2087.
32. Bangalore S, Guo Y, Samadashvili Z, Blecker S, Xu J, Hannan EL. Everolimus-Eluting Stents or Bypass Surgery for Multivessel Coronary Disease. *N Engl J Med.* 2015;372: 1213–1222.
33. Velazquez EJ, Lee KL, Jones RH, Al-Khalidi HR, Hill JA, Panza JA, Michler RE, Bonow RO, Doenst T, Petrie MC, Oh JK, She L, Moore VL, Desvigne-Nickens P, Sopko G, Rouleau JL; STICHES Investigators. Coronary-Artery Bypass Surgery in Patients with Ischemic Cardiomyopathy. *N Engl J Med.* 2016 Apr 21;374(16):1511-20.

34. Ahn J-M, Oh J-H, Sun BJ, Cho SW, Kim YR, Lee CH, Hwang KW, Song H, Kim WJ, Lee JY, Kang SJ, Park DW, Lee SW, Kim YH, Lee CW, Park SW, Park SJ. Comparisons of Drug-Eluting Stents vs. Coronary-Artery Bypass Grafting for Patients with Multi-Vessel Disease and Severely Compromised Ventricular Dysfunction. *Am J Cardiol.* 2011 Apr 27; Issue 8, Suppl; 87A.
35. Morrison DA, Sethi G, Sacks J, Henderson W, Grover F, Sedlis S, Esposito R, Ramanathan K, Weiman D, Saucedo J, Antakli T, Paramesh V, Pett S, Vernon S, Birjiniuk V, Welt F, Krucoff M, Wolfe W, Lucke JC, Mediratta S, Booth D, Barbieri C, Lewis D; Angina With Extremely Serious Operative Mortality Evaluation (AWESOME). Percutaneous coronary intervention versus coronary artery bypass graft surgery for patients with medically refractory myocardial ischemia and risk factors for adverse outcomes with bypass: a multicenter, randomized trial. *J Am Coll Cardiol.* 2001;38: 143–149.
36. Schwann TA, Engoren M, Bonnell M, Clancy C, Habib RH. Comparison of late coronary artery bypass graft survival effects of radial artery versus saphenous vein grafting in male and female patients. *Ann Thorac Surg* 2012;94:1485–91.
37. Navarese EP, Kowalewski M, Kandzari D, Lansky A, Górny B, Kołtowski L, Waksman R, Berti S, Musumeci G, Limbruno U, van der Schaaf RJ, Kelm M, Kubica J, Suryapranata H; First-generation versus second-generation drug-eluting stents in current clinical practice: updated evidence from a comprehensive meta-analysis of randomised clinical trials comprising 31 379 patients. *Open Heart.* 2014;1:e000064.
38. Navarese EP, Tandjung K, Claessen B, Andreotti F, Kowalewski M, Kandzari DE, Kereiakes DJ, Waksman R, Mauri L, Meredith IT, Finn AV, Kim HS, Kubica J, Suryapranata H, Aprami TM, Di Pasquale G, von Birgelen C, Kedhi E. Safety and efficacy outcomes of first and second generation durable polymer drug eluting stents and biodegradable polymer biolimus eluting stents in clinical practice: comprehensive network meta-analysis. *BMJ.* 2013 Nov 6;347:f6530.
39. Ronco C, McCullough P, Anker SD, Anand I, Aspromonte N, Bagshaw SM, Bellomo R, Berl T, Bobek I, Cruz DN, Daliento L, Davenport A, Haapio M, Hillege H, House AA, Katz N, Maisel A, Mankad S, Zanco P, Mebazaa A, Palazzuoli A, Ronco F, Shaw A, Sheinfeld G, Soni S, Vescovo G, Zamperetti N, Ponikowski P; Acute Dialysis Quality Initiative (ADQI) consensus group.. Cardio-renal syndromes: report from the consensus conference of the Acute Dialysis Quality Initiative. *European Heart Journal.* 2010;31(6):703-711.
40. Serruys PW, Morice MC, Kappetein AP, Colombo A, Holmes DR, Mack MJ, Ståhle E, Feldman TE, van den Brand M, Bass EJ, Van Dyck N, Leadley K, Dawkins KD, Mohr FW; SYNTAX Investigators. Percutaneous coronary intervention versus coronary-artery bypass grafting for severe coronary artery disease. *N Engl J Med.* 2009 Mar 5;360(10):961-72.
41. Farkouh ME, Domanski M, Sleeper LA, Siami FS, Dangas G, Mack M, Yang M, Cohen DJ, Rosenberg Y, Solomon SD, Desai AS, Gersh BJ, Magnuson EA, Lansky A, Boineau R, Weinberger J, Ramanathan K, Sousa JE, Rankin J, Bhargava B, Buse J, Hueb W, Smith CR, Muratov V, Bansilal S, King S 3rd, Bertrand M, Fuster V; FREEDOM Trial Investigators. Strategies for multivessel revascularization in patients with diabetes. *N Engl J Med.* 2012 Dec 20;367(25):2375-84.
42. Windecker S, Kolh P, Alfonso F, Collet JP, Cremer J, Falk V, Filippatos G, Hamm C, Head SJ, Jüni P, Kappetein AP, Kastrati A, Knuuti J, Landmesser U, Laufer G, Neumann FJ, Richter DJ, Schauerte P, Sousa Uva M, Stefanini GG, Taggart DP, Torracca L, Valgimigli M, Wijns W,

- Witkowski A. 2014 ESC/EACTS Guidelines on myocardial revascularization. *Eur Heart J.* 2014;35: 2541–2619.
43. Fihn SD, Blankenship JC, Alexander KP, Bittl JA, Byrne JG, Fletcher BJ, Fonarow GC, Lange RA, Levine GN, Maddox TM, Naidu SS, Ohman EM, Smith PK. 2014 ACC/AHA/AATS/PCNA/SCAI/STS Focused Update of the Guideline for the Diagnosis and Management of Patients With Stable Ischemic Heart Disease A Report of the American College of Cardiology/American Heart Association Task Force on Practice Guidelines, and the American Association for Thoracic Surgery, Preventive Cardiovascular Nurses Association, Society for Cardiovascular Angiography and Interventions, and Society of Thoracic Surgeons. *Circulation.* 2014;130: 1749–1767.
  44. Buszman PE, Kiesz SR, Bochenek A, Peszek-Przybyla E, Szkrobka I, Debinski M, Bialkowska B, Dudek D, Gruszka A, Zurakowski A, Milewski K, Wilczynski M, Rzeszutko L, Buszman P, Szymshal J, Martin JL, Tendera M. Acute and late outcomes of unprotected left main stenting in comparison with surgical revascularization. *J Am Coll Cardiol.* 2008;51: 538–545.
  45. Morice M-C, Serruys PW, Kappetein AP, Feldman TE, Ståhle E, Colombo A, Mack MJ, Holmes DR, Torracca L, van Es GA, Leadley K, Dawkins KD, Mohr F. Outcomes in patients with de novo left main disease treated with either percutaneous coronary intervention using paclitaxel-eluting stents or coronary artery bypass graft treatment in the Synergy Between Percutaneous Coronary Intervention with TAXUS and Cardiac Surgery (SYNTAX) trial. *Circulation.* 2010;121: 2645–2653.
  46. Park S-J, Kim Y-H, Park D-W, Yun S-C, Ahn JM, Song HG, Lee JY, Kim WJ, Kang SJ, Lee SW, Lee CW, Park SW, Chung CH, Lee JW, Lim DS, Rha SW, Lee SG, Gwon HC, Kim HS, Chae IH, Jang Y, Jeong MH, Tahk SJ, Seung KB. Randomized trial of stents versus bypass surgery for left main coronary artery disease. *N Engl J Med.* 2011;364: 1718–1727.
  47. Bittl JA, He Y, Jacobs AK, Yancy CW, Normand SL. American College of Cardiology Foundation/American Heart Association Task Force on Practice Guidelines. Bayesian methods affirm the use of percutaneous coronary intervention to improve survival in patients with unprotected left main coronary artery disease. *Circulation.* 2013;127: 2177–2185.
  48. Verma S, Farkouh ME, Yanagawa B, Fitchett DH, Ahsan MR, Ruel M, Sud S, Gupta M, Singh S, Gupta N, Cheema AN, Leiter LA, Fedak PW, Teoh H, Latter DA, Fuster V, Friedrich JO. Comparison of coronary artery bypass surgery and percutaneous coronary intervention in patients with diabetes: a meta-analysis of randomised controlled trials. *Lancet Diabetes Endocrinol.* 2013;1: 317–328.
  49. Farkouh ME, Domanski M, Sleeper LA, Siami FS, Dangas G, Mack M, Yang M, Cohen DJ, Rosenberg Y, Solomon SD, Desai AS, Gersh BJ, Magnuson EA, Lansky A, Boineau R, Weinberger J, Ramanathan K, Sousa JE, Rankin J, Bhargava B, Buse J, Hueb W, Smith CR, Muratov V, Bansilal S, King S 3rd, Bertrand M, Fuster V; FREEDOM Trial Investigators. Strategies for multivessel revascularization in patients with diabetes. *N Engl J Med.* 2012;367: 2375–2384.
  50. Ling LF, Marwick TH, Flores DR, Jaber WA, Brunken RC, Cerqueira MD, Hachamovitch R. Identification of Therapeutic Benefit from Revascularization in Patients With Left Ventricular Systolic Dysfunction Inducible Ischemia Versus Hibernating Myocardium. *Circ Cardiovasc Imaging.* 2013;6: 363–372.
